# Supplementary material for: An aerosol synthesized CeO2:Eu3+/Na+ red nanophosphor with enhanced photoluminescence
Source: Royal Society of Chemistry journal article supplement (doi:10.1039/c6ra16551f), 2016-01-01
Supplement: c6ra16551f1.pdf [file c6ra16551f1.pdf]

## Supporting Information

### Aerosol synthesized $\text{CeO}_2:\text{Eu}^{3+}/\text{Na}^+$ red nanophosphor with enhanced photoluminescence

Byeong Ho Min,<sup>a</sup> Jong Chan Lee,<sup>a</sup> Kyeong Youl Jung,<sup>a,\*</sup> Dae Sung Kim,<sup>b</sup> Byung-Ki Choi,<sup>c</sup> and Wkang-Jung Kang<sup>c</sup>

**Fig. S1.** Schematic diagram of the spray pyrolysis system

**Fig. S2.** Lattice constants and crystallite size as a function of  $\text{Eu}^{3+}$  content for  $\text{CeO}_2:\text{Eu}$  particles prepared by spray pyrolysis.

**Fig. S3.** Comparison of (a) lattice constants and (b) R/O ratio

**Fig. S4.** PL spectra (a) and relative emission intensity of  $\text{CeO}_2:\text{Eu}^{3+}$  particles prepared with changing the ethylene glycol.

**Fig. S5.** SEM photos of  $\text{CeO}_2:\text{Eu}^{3+}$  particles prepared from the solution containing 0.1 M EG

**Fig. S6.** Emission (a) and excitation (b) spectra of  $\text{CeO}_2:\text{Eu}^{3+}$  particles prepared from the solution containing 0.1 M EG.

**Fig. S7.** Excitation (a) and emission (b) spectra of  $\text{CeO}_2:\text{Eu}^{3+}/\text{Na}^+$  particles prepared from the solution containing 0.1 M EG.

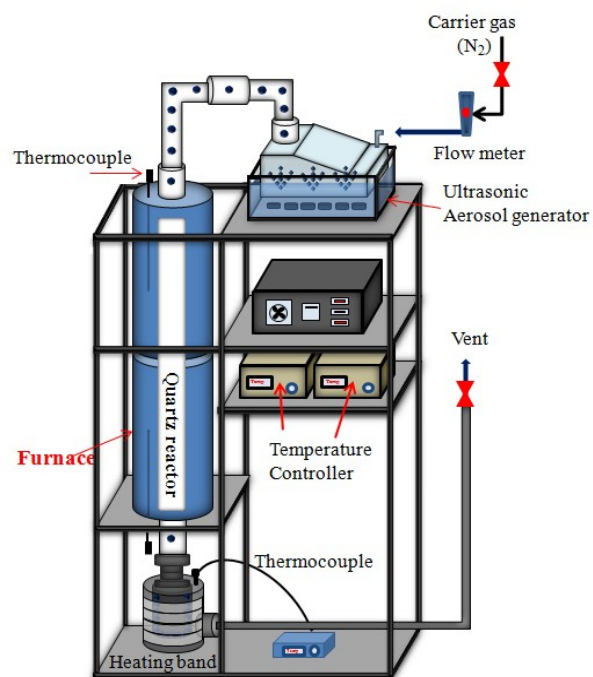

**Fig. S1.** Schematic diagram of the spray pyrolysis system.

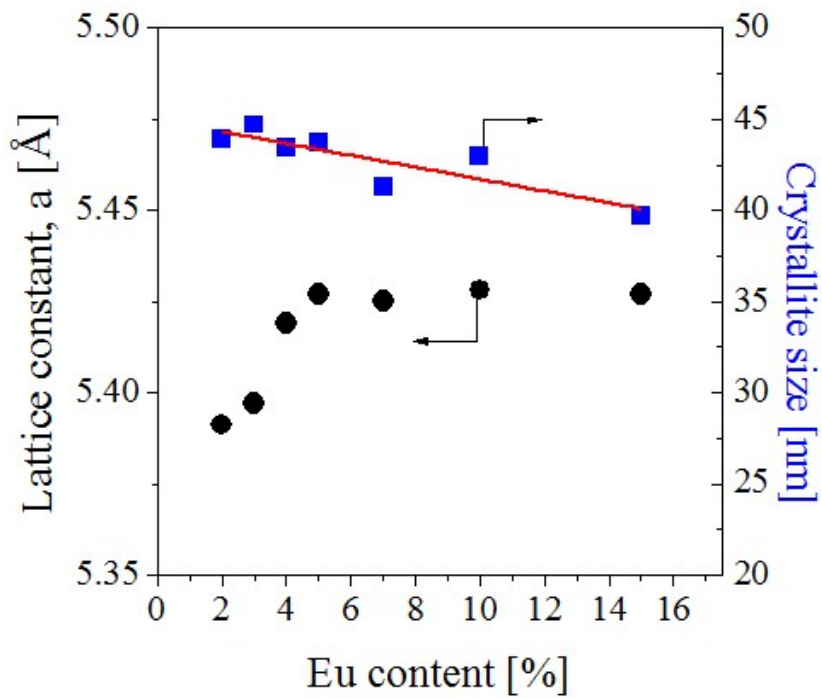

**Fig. S2.** Lattice constants and crystallite size as a function of  $\text{Eu}^{3+}$  content for  $\text{CeO}_2:\text{Eu}$  particles prepared by spray pyrolysis.

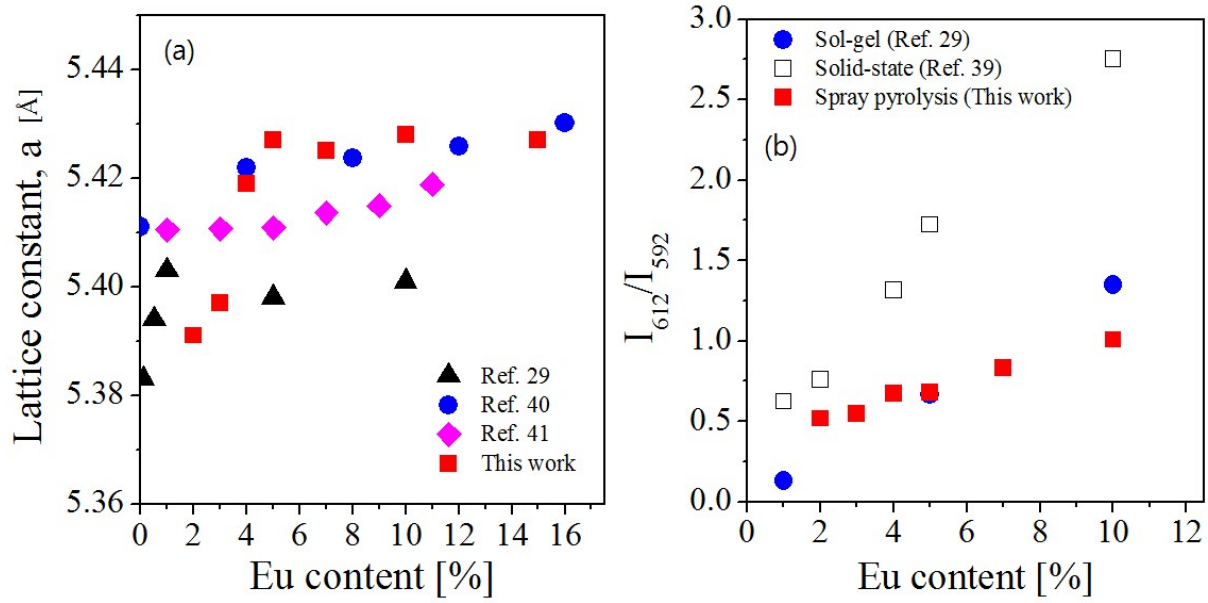

**Fig. S3.** Comparison of (a) lattice constants and (b) R/O ratio

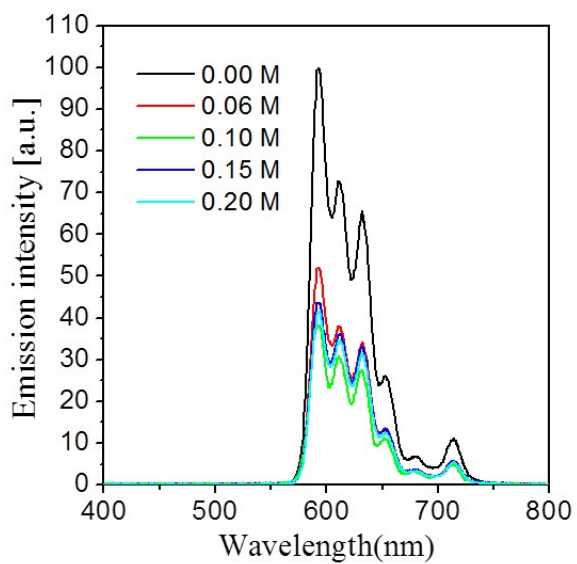

(a)

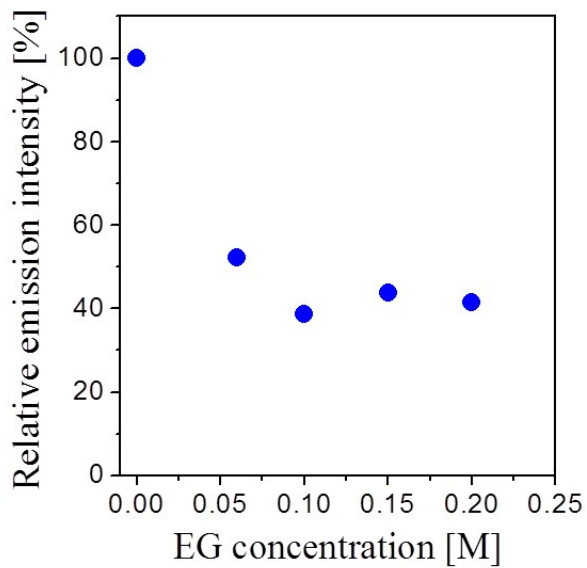

(b)

**Fig. S4.** PL spectra (a) and relative emission intensity of CeO<sub>2</sub>:Eu<sup>3+</sup> particles prepared with changing the ethylene glycol.

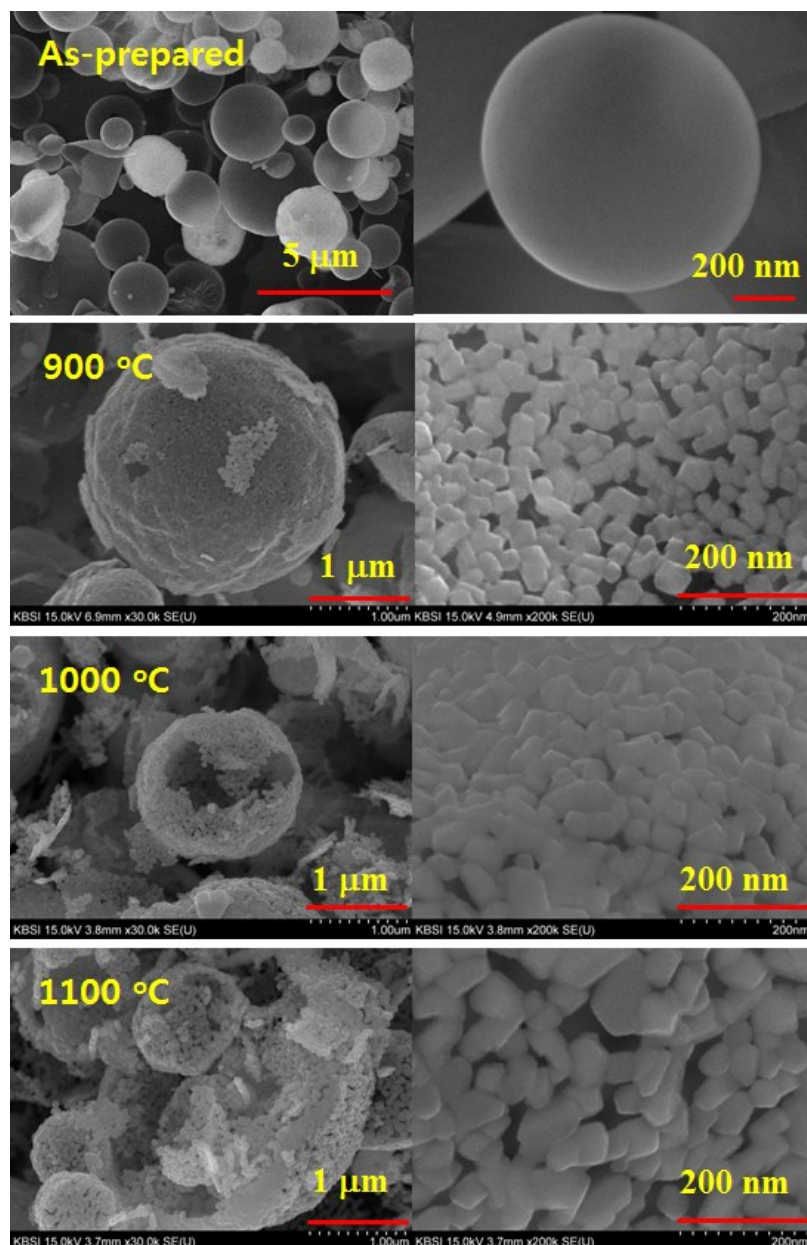

**Fig. S5.** SEM photos of  $\text{CeO}_2:\text{Eu}^{3+}$  particles prepared from the solution containing 0.1 M EG.

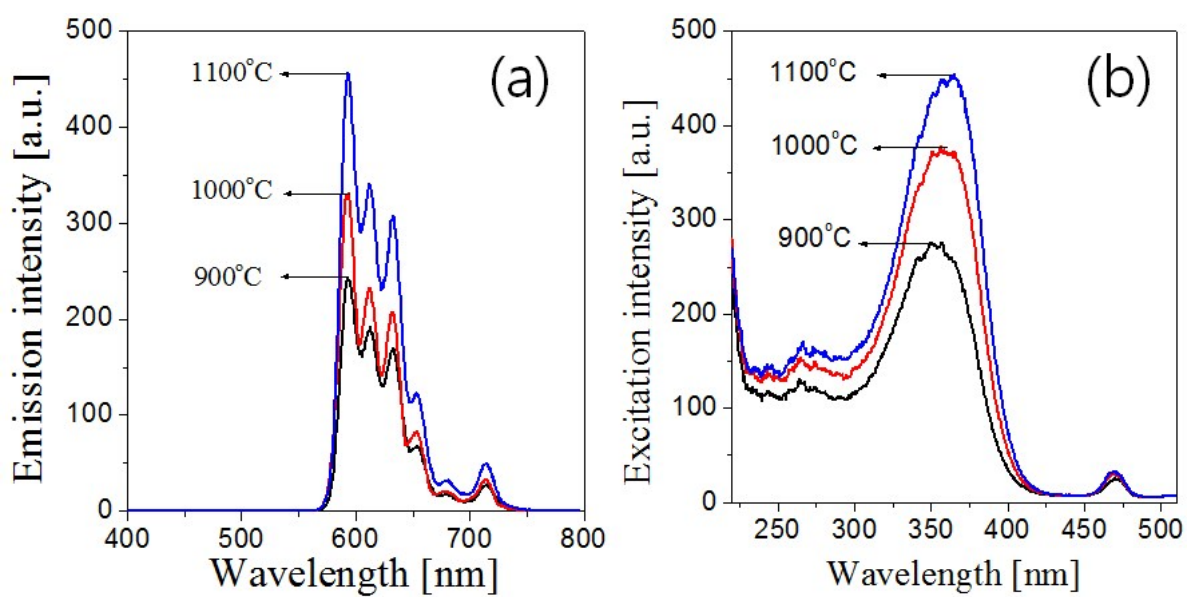

**Fig. S6.** Emission (a) and excitation (b) spectra of CeO<sub>2</sub>:Eu<sup>3+</sup> particles prepared from the solution containing 0.1 M EG.

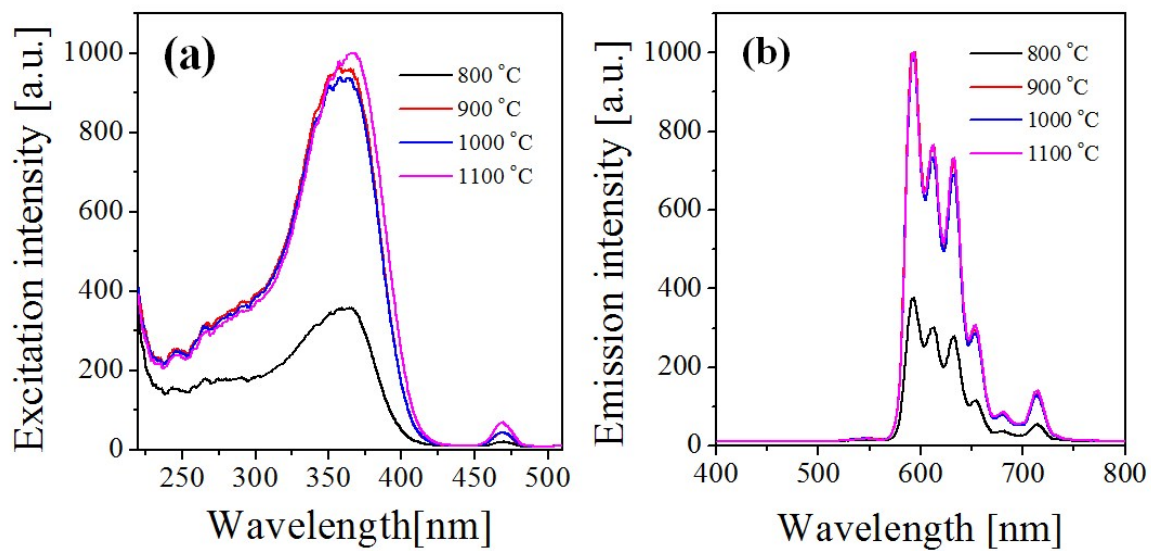

**Fig. S7.** Excitation (a) and emission (b) spectra of  $\text{CeO}_2:\text{Eu}^{3+}/\text{Na}^+$  particles prepared from the solution containing 0.1 M EG.
